# Supplementary material for: Evolution and expression patterns of the neo-sex chromosomes of the crested ibis
Source: PubMed Central journal article supplement (PMC10891136; doi:10.1038/s41467-024-46052-x), 2024-02-23
Supplement: 41467_2024_46052_MOESM4_ESM.pdf [file 41467_2024_46052_MOESM4_ESM.pdf]

## Description of Additional Supplementary Files

### Supplementary Data 1

Description: Statistics of assemblies of W chromosomes in birds uploaded to public database.

### Supplementary Data 2

Description: The results of alignments between the crested ibis' neo-Z chromosome and chicken's genome.

### Supplementary Data 3

Description: The results of alignments between the crested ibis' neo-W chromosome and chicken's genome.

### Supplementary Data 4

Description: List of identified one-to-one gametologs between the neo-Z and W chromosomes of crested ibis.

### Supplementary Data 5

Description: Identified one to one orthologs among chromosome 22 of chicken, neo-W and neo-Z chromosomes of crested ibis.

### Supplementary Data 6

Description: Genes retained in the ancient-SDR of the neo-W chromosome of crested ibis.

### Supplementary Data 7

Description: The expression profiles of ovary specific genes on ancient-SDR of the neo-W chromosome of crested ibis.

### Supplementary Data 8

Description: Chicken chr22 Sequences and primers for specific probes synthesis.

### Supplementary Data 9

Description: Accessions of Genome and RNA data of other species by a two-serial MEG bank.
